# Supplementary material for: Diversity of cis-regulatory elements associated with auxin response in Arabidopsis thaliana
Source: PubMed Central journal article supplement (PMC5853796; doi:10.1093/jxb/erx254), 2017-07-27

Fig. S1. Significant matches (e-value<0.05) of auxin-associated cis-regulatory elements with transcription factor binding sites identified by Tomtom tool (Gupta et al., 2007).

For each element alignment of two logos are presented: a transcription factor binding site sequence (above) and a hexamer sequence (below).

AATATT | AATATT

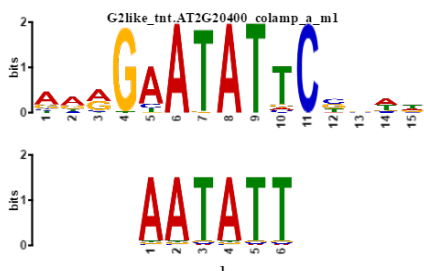

AATATC | GATATT

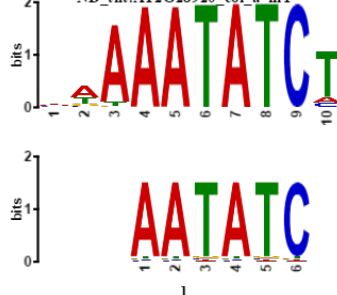

AAATAT | ATATTT

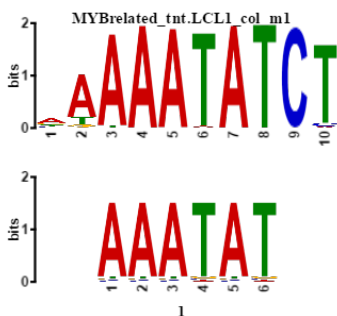

CACGTG | CACGTG

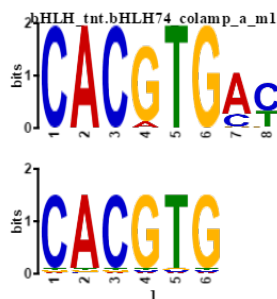

ACGTGG | CCACGT

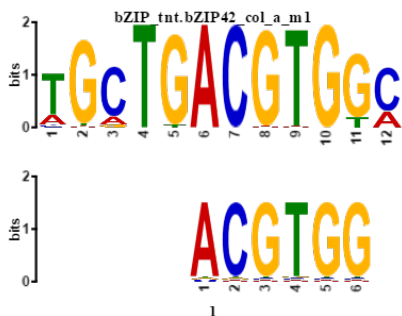

CACGTA | TACGTG

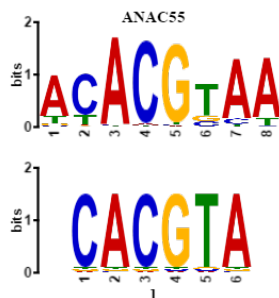

ACACGT | ACGTGT

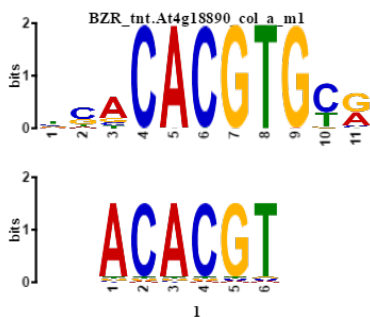

AAAAAT | ATTTTT

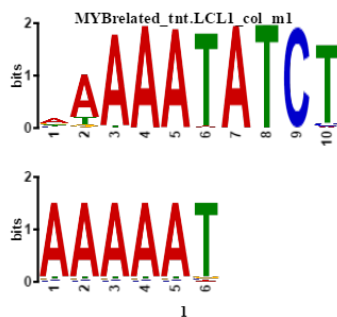

TAATTA | TAATTA

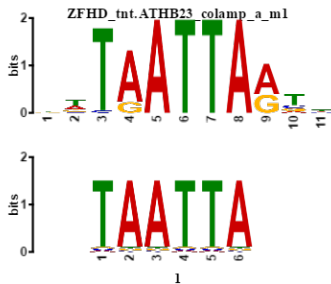

e-value =  
1.11e-02

AAAATA | TATTTT

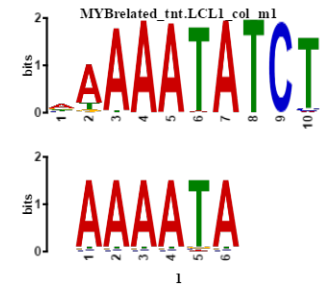

e-value =  
9.29e-03

AATCAT | ATGATT

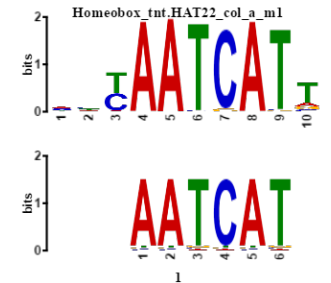

e-value =  
2.50e-02

AATTA | TTAATT

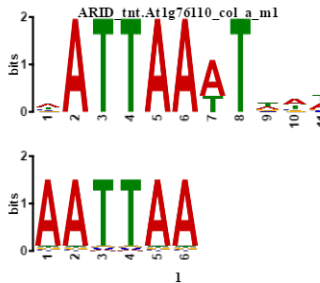

e-value =  
3.67e-02

AATTAT | ATAATT

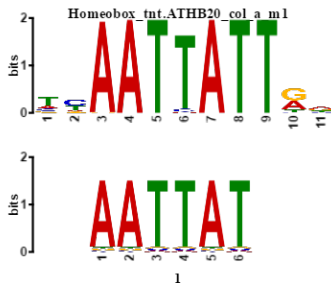

e-value =  
1.11e-02

AAATGA | TCATTT

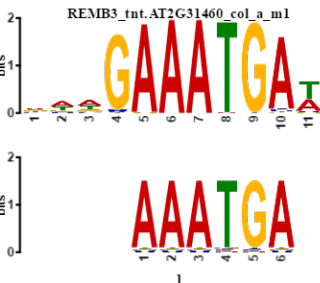

e-value =  
3.50e-02

AATAAT | ATTATT

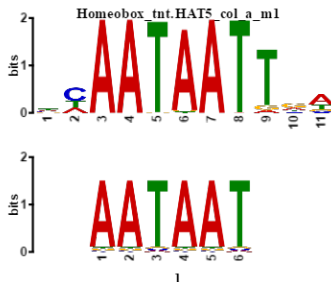

e-value =  
1.68e-03

CAATAA | TTATTG

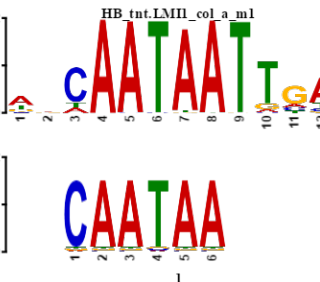

e-value =  
4.00e-02

AATGAT | ATCATT

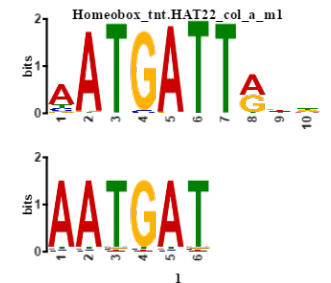

e-value =  
2.50e-02

AAAAAA | TTTTTT

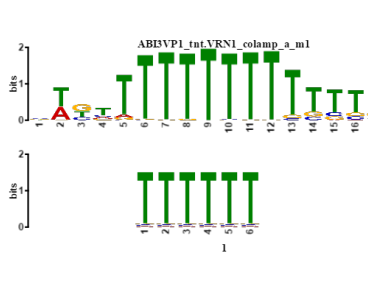

e-value =  
3.92e-03

CATGCA | TGCATG

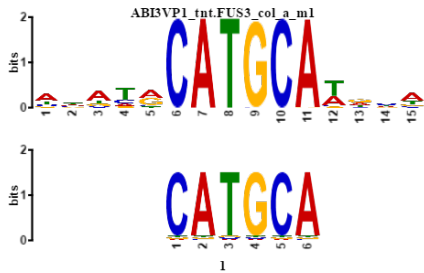

e-value =  
3.75e-02

ACGTTA | TCACCT

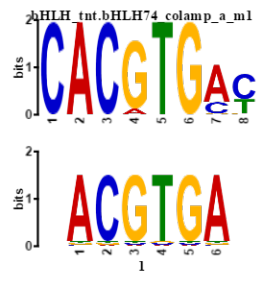

e-value =  
4.72e-02

AACCCT | AGGGTT

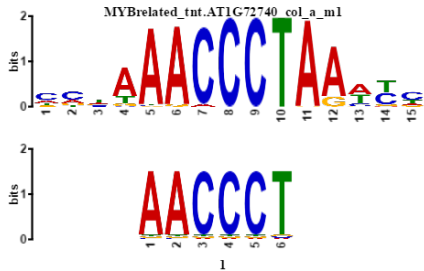

e-value =  
3.75e-02

CTTATC | GATAAG

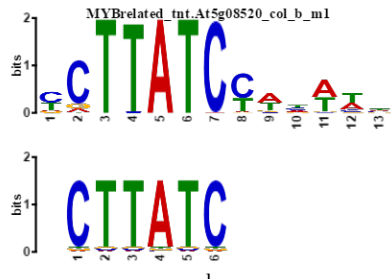

e-value =  
3.46e-02

CACACG | CGTGTG

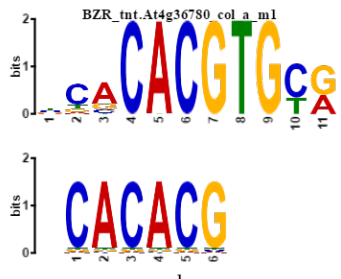

e-value =  
4.62e-02

GGGGAC | GTCCCC

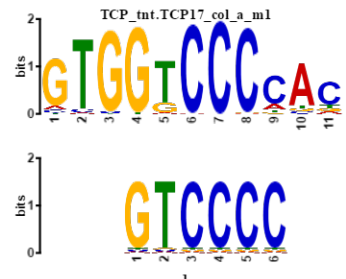

e-value =  
3.86e-02

CGTGTG | TACACG

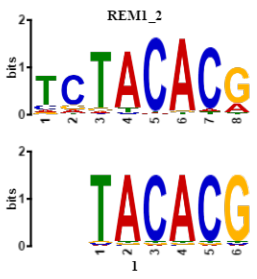

e-value =  
3.91e-02

AATATT | AATATT

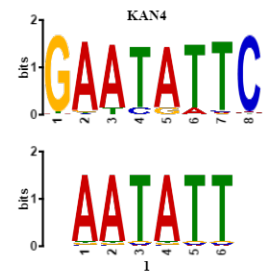

e-value =  
4.19e-02

AATATC | GATATT

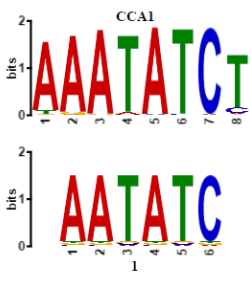

e-value =  
2.01e-02

AAATAT | ATATTT

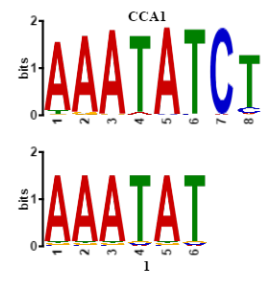

e-value =  
2.87e-03

CACGTG | CACGTG

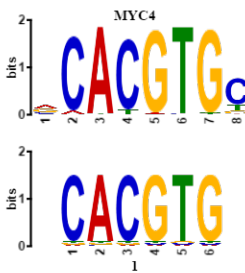

e-value = 2.40e-02

ACGTGG | CACGTG

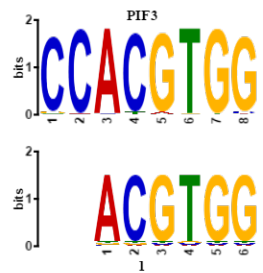

e-value = 2.40e-02

CACGTA | TACGTG

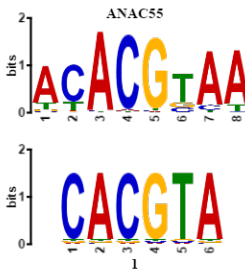

e-value = 3.91e-02

ACACGT | ACGTGG

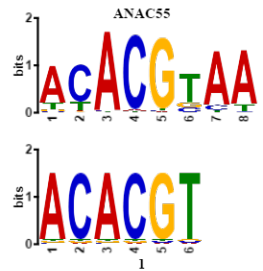

e-value = 3.91e-02

ATATTC | GAATAT

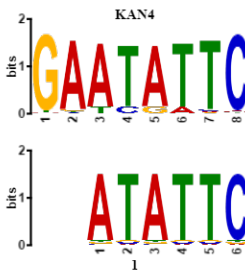

e-value = 2.01e-02

AACTAA | TTAGTT

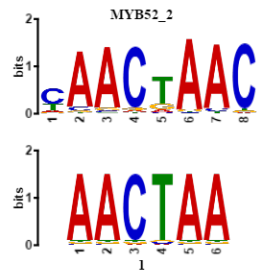

e-value = 2.01e-02

ATATAT | ATATAT

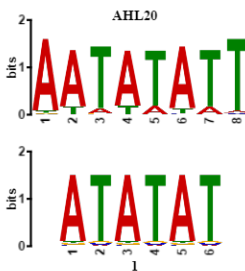

e-value = 4.19e-02

AATATA | TATATT

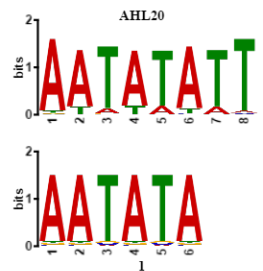

e-value = 3.15e-02

ACGTAA | TTACGT

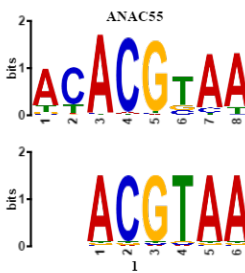

e-value = 2.13e-02

GGCCCA | TGGGCC

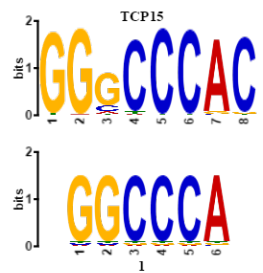

e-value = 2.54e-02

**Fig. S2. Distribution of AT-rich hexamers identified as associated with early auxin response along the upstream regions in Arabidopsis genes.** The hexamers amount was calculated per each 100 nt in [-1500; +1] upstream regions of all genes (black line), auxin up-regulated (red line) and auxin down-regulated genes (blue line).

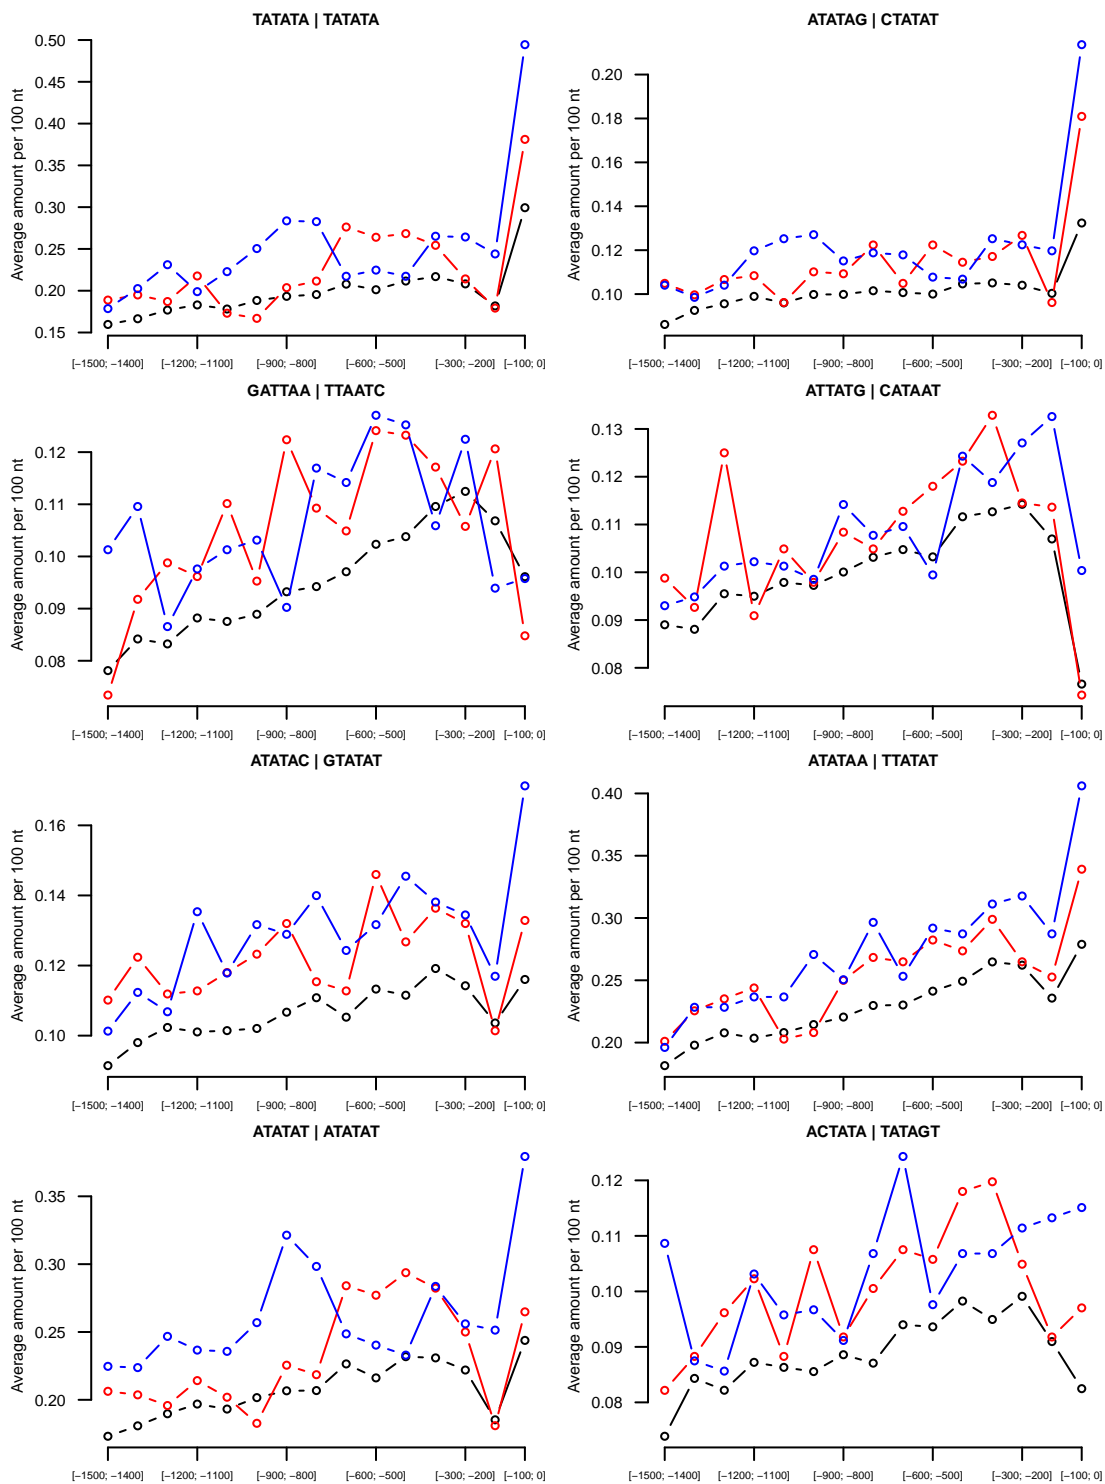

TAATTA | TAATTA

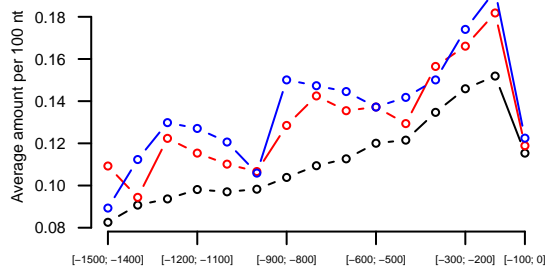

ATAATG | CATTAT

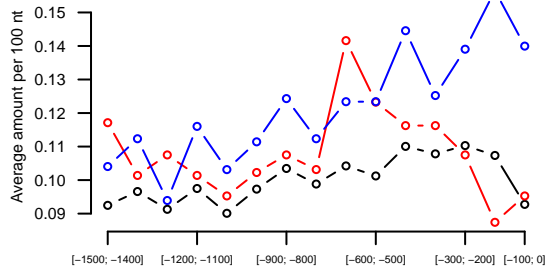

AATATG | CATATT

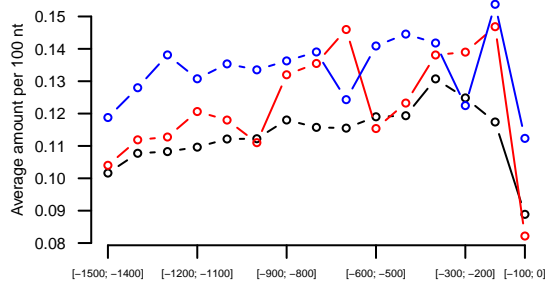

ATTAGA | TCTAAT

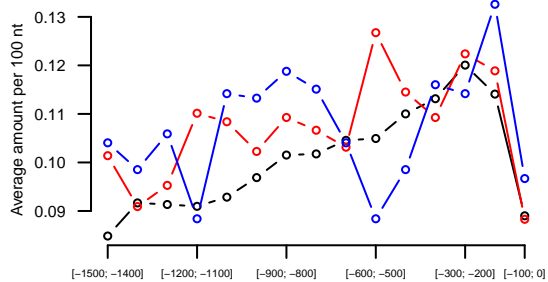

TATTA | TTAATA

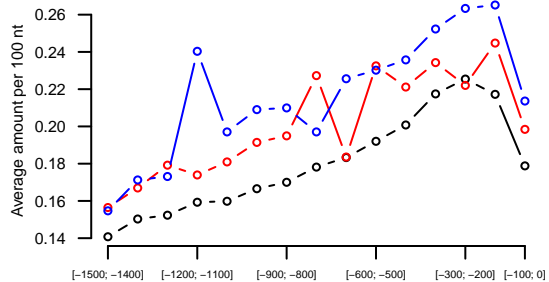

AAATAC | GTATT

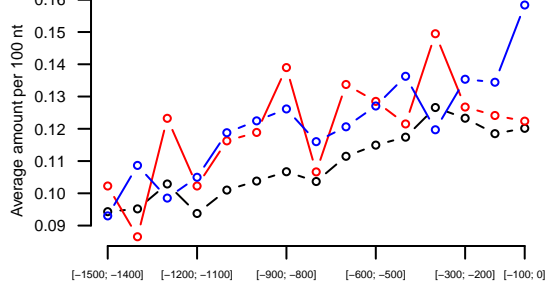

AACATT | AATGTT

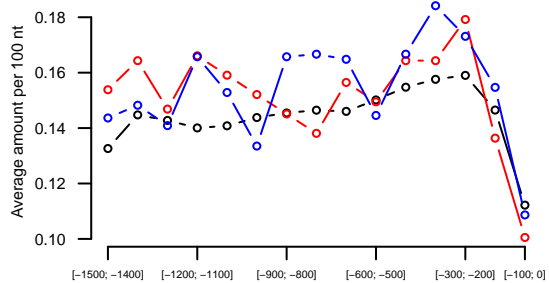

TATAAA | TTTATA

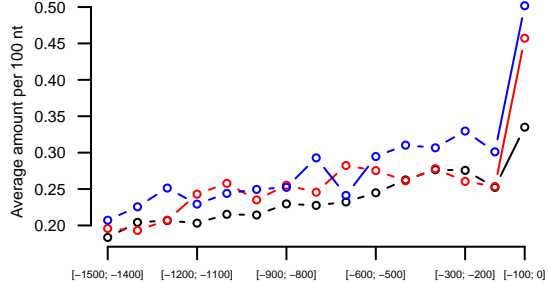

Supplement: erx254_suppl_supplementary_figures_s1_s2.pdf [file erx254_suppl_supplementary_figures_s1_s2.pdf]
